# Supplementary material for: Real-world comparative effectiveness of nab-paclitaxel plus gemcitabine versus FOLFIRINOX in advanced pancreatic cancer: a systematic review
Source: PubMed Central journal article supplement — Ther Adv Med Oncol. 2019 May 19;11:1758835919850367. doi: 10.1177/1758835919850367 (PMC6535755; doi:10.1177/1758835919850367), 2019-05-19
Supplement: Supplementary_Table_1.pdf [file Supplementary_Table_1.pdf]

**Supplementary Table 1.** Quality of Included Studies as Assessed by the Newcastle-Ottawa Scale

| Study                                    | Selection <sup>a</sup> | Comparability <sup>a</sup> | Outcome <sup>a</sup> | Total Score (out of 9) <sup>b</sup> |
|------------------------------------------|------------------------|----------------------------|----------------------|-------------------------------------|
| <b>mPC Studies</b>                       |                        |                            |                      |                                     |
| <b>Beyer 2016</b> <sup>47</sup>          | ****                   | *                          | ***                  | 8                                   |
| <b>Park 2016</b> <sup>31</sup>           | ***                    | **                         | *                    | 6                                   |
| <b>Patel 2016</b> <sup>34</sup>          | ****                   | **                         | **                   | 8                                   |
| <b>Schmidt 2016</b> <sup>24</sup>        | ****                   | **                         | **                   | 8                                   |
| <b>Abrams 2017</b> <sup>11</sup>         | ****                   | **                         | ***                  | 9                                   |
| <b>Braiteh 2017</b> <sup>25</sup>        | ****                   | **                         | ***                  | 9                                   |
| <b>Caponnetto 2017</b> <sup>48</sup>     | ***                    | *                          | **                   | 6                                   |
| <b>Kim 2017</b> <sup>33</sup>            | ****                   | **                         | ***                  | 9                                   |
| <b>Mañes-Sevilla 2017</b> <sup>26</sup>  | ****                   | *                          | ***                  | 8                                   |
| <b>McBride 2017</b> <sup>35</sup>        | ****                   | *                          | **                   | 7                                   |
| <b>Watanabe 2017</b> <sup>19</sup>       | ***                    | *                          | *                    | 5                                   |
| <b>Barrera 2018</b> <sup>30</sup>        | ****                   | *                          | ***                  | 8                                   |
| <b>Cartwright 2018</b> <sup>16</sup>     | ****                   | *                          | ***                  | 8                                   |
| <b>Cho 2018</b> <sup>29</sup>            | ****                   | **                         | **                   | 8                                   |
| <b>Kang 2018</b> <sup>18</sup>           | ****                   | *                          | ***                  | 8                                   |
| <b>Kim 2018</b> <sup>17</sup>            | ****                   | **                         | ***                  | 9                                   |
| <b>Pacheco-Barcia 2018</b> <sup>46</sup> |                        |                            |                      |                                     |
| <b>Vivaldi 2018</b> <sup>49</sup>        |                        |                            |                      |                                     |
| <b>Barrera 2019</b> <sup>32</sup>        | ***                    | **                         | *                    | 6                                   |
| <b>Henkel 2019</b> <sup>50</sup>         | ***                    | **                         | *                    | 6                                   |
| <b>Javed 2019</b> <sup>51</sup>          | ****                   | *                          | ***                  | 8                                   |
| <b>aPC Studies</b>                       |                        |                            |                      |                                     |
| <b>Cherniawsky 2017</b> <sup>52</sup>    | ***                    | **                         | *                    | 6                                   |
| <b>Kasi 2017</b> <sup>21</sup>           | ***                    | *                          | *                    | 5                                   |
| <b>Maeda 2017</b> <sup>53</sup>          | ***                    | *                          | **                   | 6                                   |
| <b>Muranaka 2017</b> <sup>20</sup>       | ****                   | *                          | **                   | 7                                   |
| <b>Papneja 2017</b> <sup>27</sup>        | ****                   | **                         | ***                  | 9                                   |
| <b>Shahda 2017</b> <sup>54</sup>         | ****                   | **                         | *                    | 7                                   |
| <b>Wang 2017</b> <sup>28</sup>           | ****                   | *                          | ***                  | 8                                   |
| <b>Franco 2018</b> <sup>55</sup>         | ****                   | *                          | ***                  | 8                                   |
| <b>Helen 2018</b> <sup>56</sup>          | ****                   | **                         | ***                  | 9                                   |
| <b>Kudlovich 2018</b> <sup>57</sup>      | ****                   | **                         | **                   | 8                                   |
| <b>Tahara 2018</b> <sup>22</sup>         | ***                    | *                          | **                   | 6                                   |

|                                            |      |   |     |      |
|--------------------------------------------|------|---|-----|------|
| <b>Terashima 2018</b> <sup>23</sup>        | **** | * | *** | 8    |
| <b>Hegewisch-Becker 2019</b> <sup>58</sup> | **** | * | *** | 8    |
| <b>Mean NOS score</b>                      |      |   |     | 7.47 |

aPC, advanced pancreatic cancer; mPC, metastatic pancreatic cancer; NOS, Newcastle-Ottawa Scale.

<sup>a</sup> The Newcastle-Ottawa Scale assigns a maximum of 4, 2, and 3 stars for selection, comparability, and outcome parameters, respectively.

<sup>b</sup> A total score of 9 denotes the highest quality.
